# Supplementary material for: Identification of a pro-angiogenic functional role for FSP1-positive fibroblast subtype in wound healing
Source: PubMed Central journal article supplement (PMC6617456; doi:10.1038/s41467-019-10965-9), 2019-07-09
Supplement: 41467_2019_10965_MOESM1_ESM.pdf [file 41467_2019_10965_MOESM1_ESM.pdf]

## **Identification of a pro-angiogenic functional role for FSP1 positive fibroblast subtype in wound healing**

Sarika Saraswati<sup>1\*</sup>, Stephanie MW Marrow<sup>1</sup>, Lester A Watch<sup>1</sup>, and Pampee P Young<sup>1,2\*</sup>

1. Department of Pathology, Microbiology, and Immunology, Vanderbilt University Medical Center, Nashville, Tennessee, USA.
2. American Red Cross, National Headquarters, Washington, D.C

Vanderbilt University Medical Center

1161 21<sup>st</sup> Ave S.

MCN C2217

Nashville TN, USA 37232-2561

\*Corresponding Authors: [pampee.young@redcross.org](mailto:pampee.young@redcross.org);  
[sarika.saraswati@vanderbilt.edu](mailto:sarika.saraswati@vanderbilt.edu)

## Supplementary Figure 1.

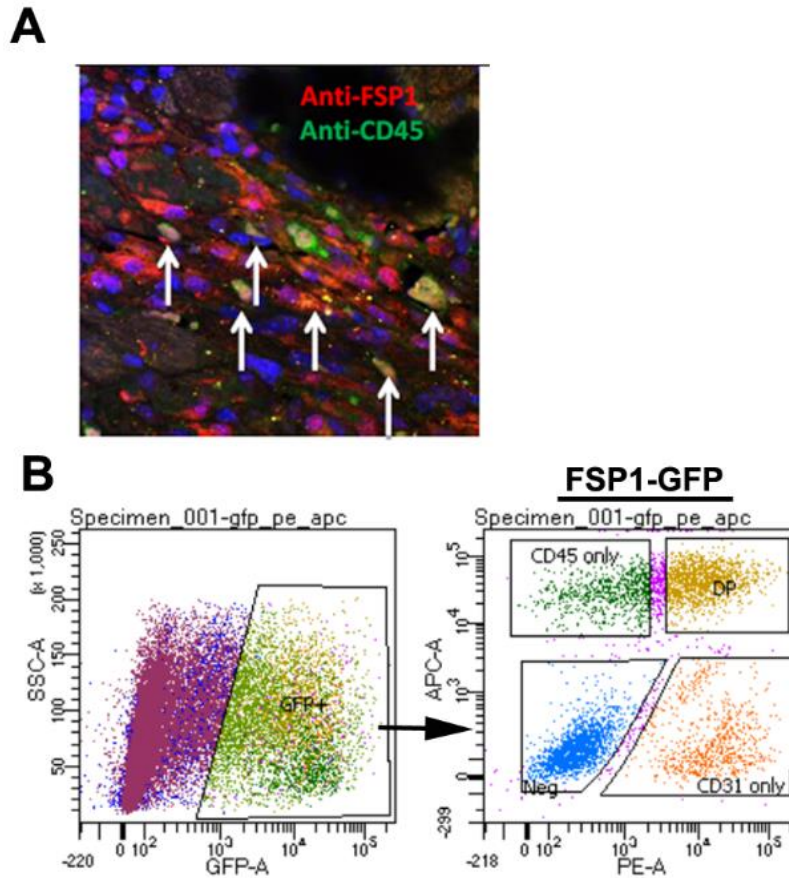

**Supplementary Figure 1. FSP1 is expressed by endothelial, hematopoietic, as well as non-endothelial/hematopoietic cell populations post-infarct. A.** Representative micrograph of the confocal analysis of FSP1 and CD45 co-immunostaining from murine heart 8 days post myocardial infarction (MI). FSP1 detected by Cy3 (red) fluorescence and CD45 by 488 (green). Arrow depicts the CD45 positive cells (hematopoietic cells) co-stained with FSP1 antibody. **B.** Representative dot plot of freshly isolated cells from FSP1-GFP mice left ventricle 10 days after MI. GFP<sup>+</sup> fibroblasts were gated as GFP<sup>+</sup>/CD45-APC<sup>+</sup>, GFP<sup>+</sup>/CD31-PE<sup>+</sup>, GFP<sup>+</sup>/CD45-APC<sup>+</sup>/CD31-PE<sup>+</sup> and GFP<sup>+</sup>/CD45-APC<sup>-</sup>/CD31-PE<sup>-</sup> (n=3).

## Supplementary Figure 2.

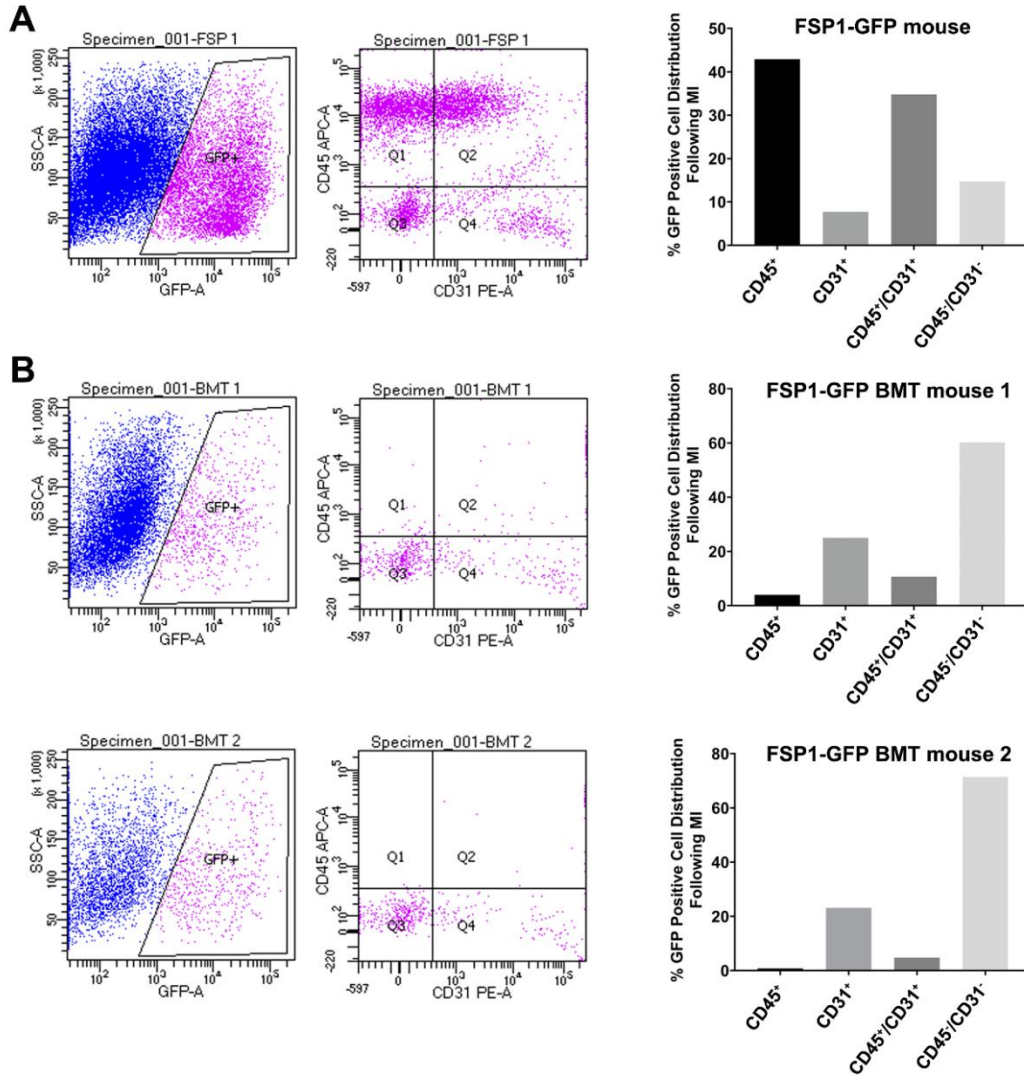

**Supplementary Figure 2. Post-infarct cardiac FSP1<sup>+</sup> fibroblasts are not recruited from the bone marrow but are activated at the site of injury. A (left panel).** Flow cytometric evaluation of freshly isolated cells from FSP1-GFP mice left ventricle 10 days after MI represented by dot plot. **B (left panel).** Flow cytometric evaluation of freshly isolated cells from bone marrow transplanted (from C57Bl/6) FSP1-GFP mice left ventricle 10 days after MI represented by dot plot. GFP<sup>+</sup> cells were gated as GFP<sup>+</sup>/CD45-APC<sup>+</sup>, GFP<sup>+</sup>/CD31-PE<sup>+</sup>, and GFP<sup>+</sup>/CD45-APC<sup>-</sup>/CD31-PE<sup>-</sup>. **A and B (right panel).**

Quantification graphed as the % distribution of GFP<sup>+</sup> CD45<sup>+</sup> CD31<sup>+</sup> cells before (A) and after BMT (B).

### Supplementary Figure 3.

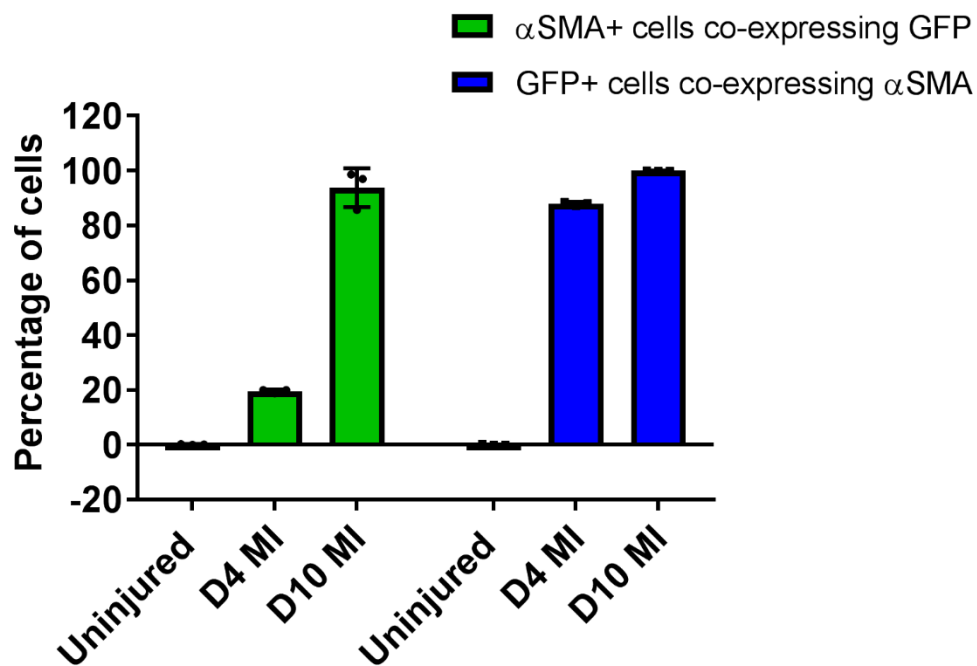

**Supplementary Figure 3.** Flow cytometric evaluation of freshly isolated cells from  $\alpha$ SMA-GFP mice hearts representing % of  $\alpha$ SMA expressing cells co-expressing GFP protein and GFP expressing cells co-expressing  $\alpha$ SMA protein prior to MI and 4 and 10 days following MI (n=3).

## Supplementary Figure 4.

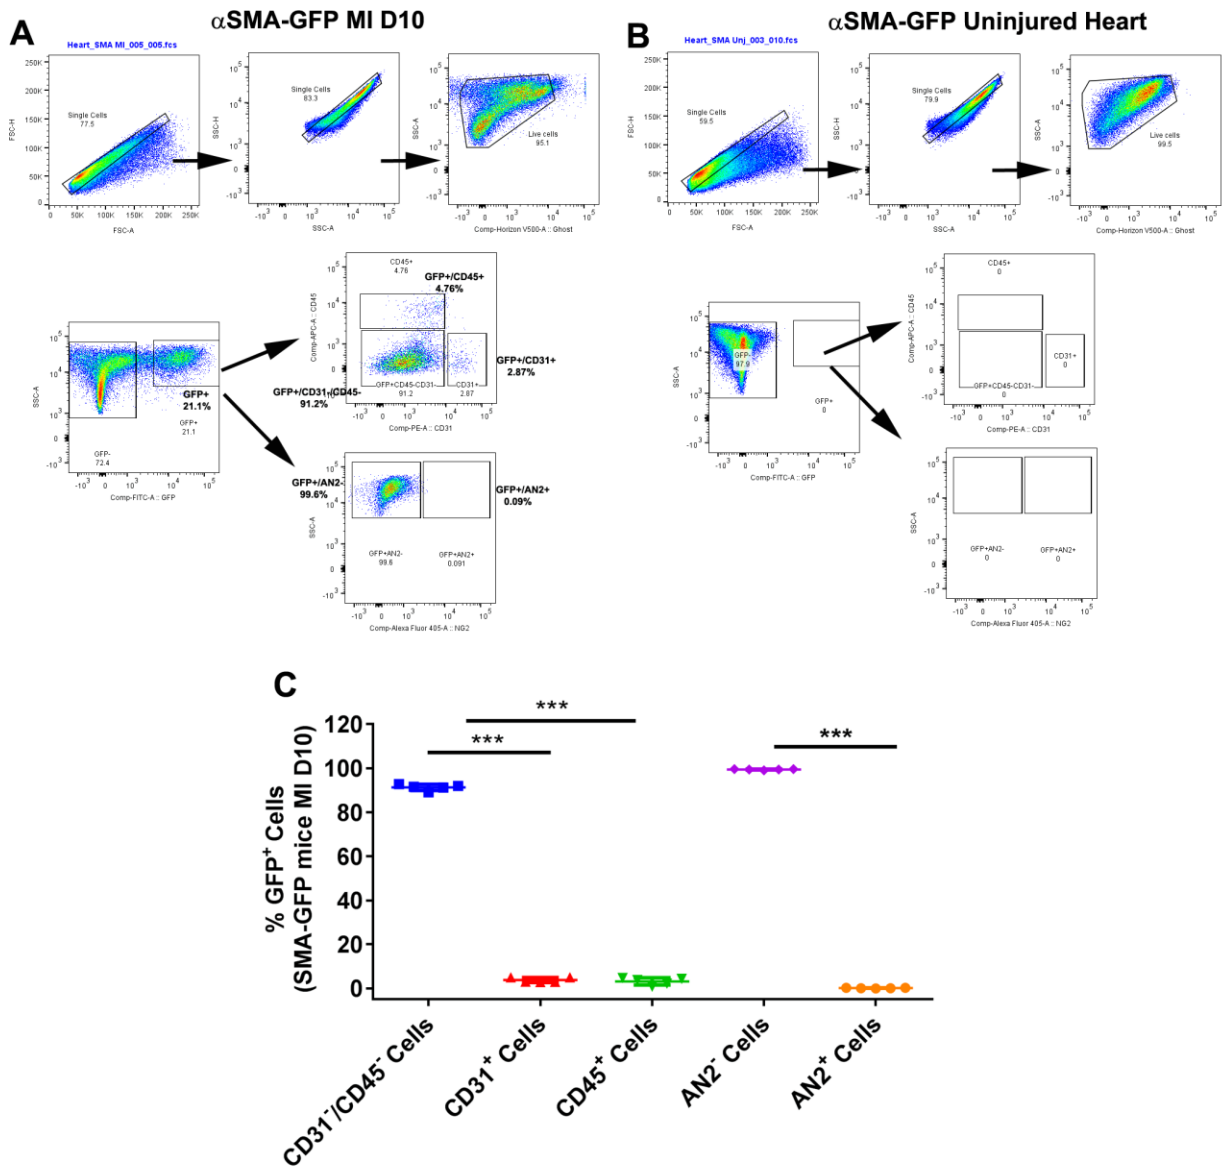

**Supplementary Figure 4. (A, B, and C)** Representative gating scheme of FACS analyses demonstrating %GFP<sup>+</sup> live cells co-expressing CD31, CD45, or AN2 from  $\alpha$ SMA-GFP mice uninjured hearts (B) or injured hearts (A) 10 days following myocardial infarction (MI). At least 5 separate isolations were done from individual mouse hearts.

The cells were freshly isolated and not pre-plated prior to analysis. The graphical quantification of the data is presented (C).

### Supplementary Figure 5.

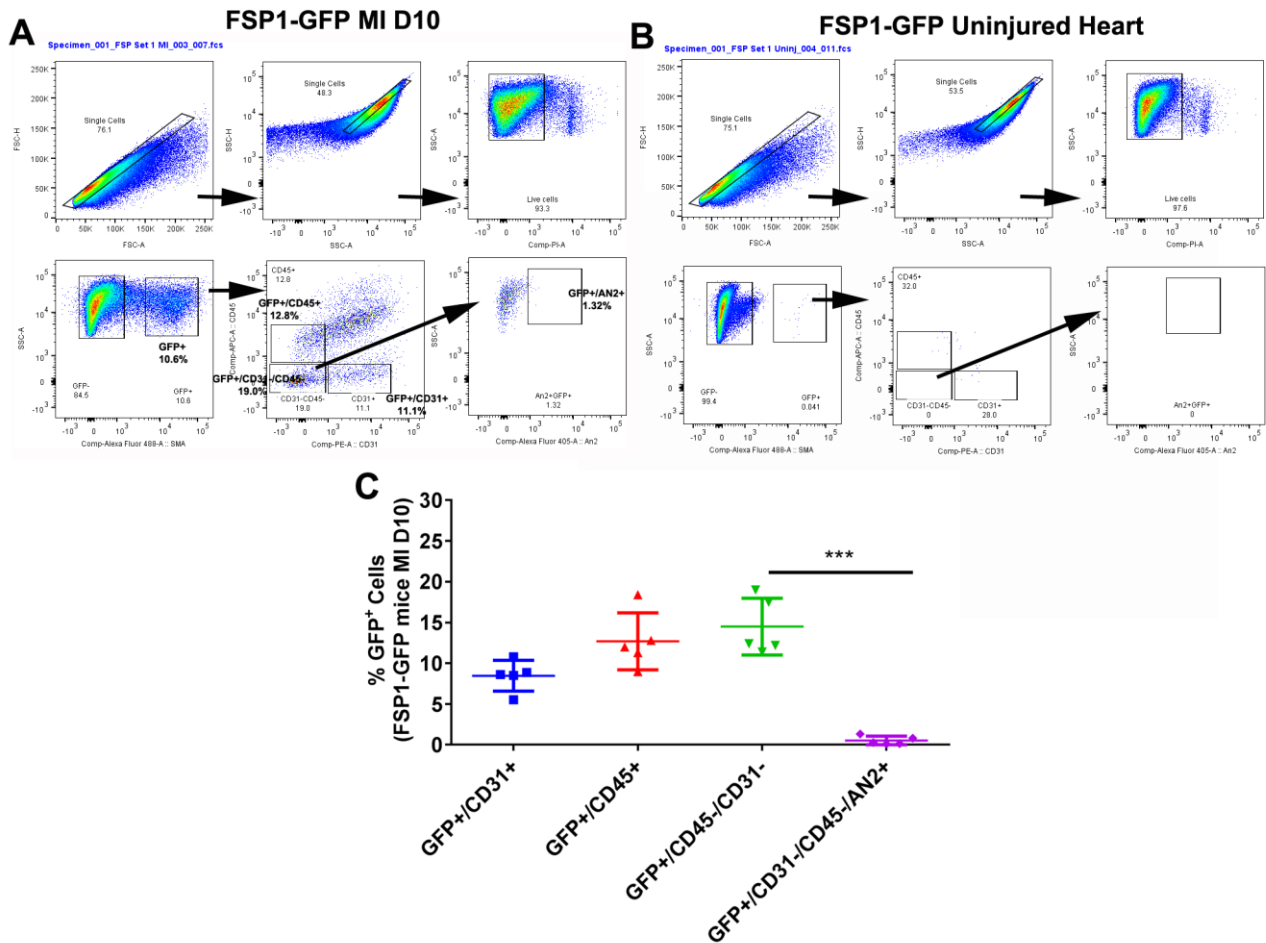

**Supplementary Figure 5. (A, B, and C)** Representative gating scheme of FACS analyses demonstrating %GFP+ live cells expressing CD31 or CD45 markers from FSP1-GFP mice uninjured hearts (B) or injured hearts (A) 10 days following myocardial infarction (MI). GFP+/CD31-/CD45- cells were then analyzed for the expression of pericyte marker AN2. At least 5 separate isolations were done from individual mouse

hearts. The cells were freshly isolated and not pre-plated prior to analysis. The graphical quantification of the data is presented (C).

### Supplementary Figure 6.

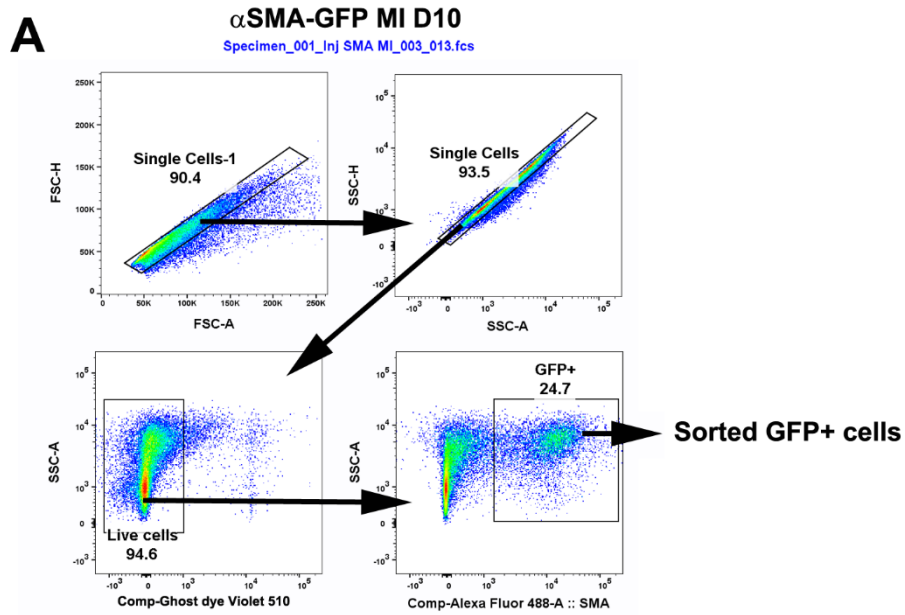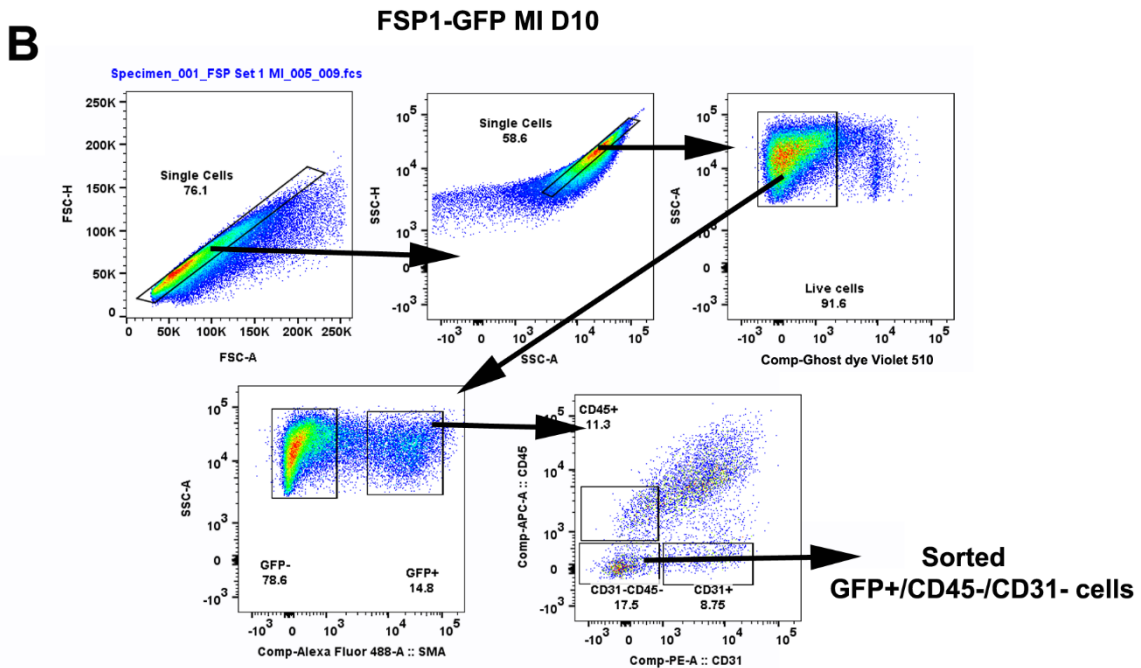

**Supplementary Figure 6. (A and B)** Gating strategy used for cell sorting. (A) Gating strategy to FACS sort GFP+ live cells from  $\alpha$ SMA-GFP mice injured hearts 10 days following myocardial infarction (MI). (B) Gating strategy to FACS sort GFP+/CD31-/CD45- live cells from FSP1-GFP mice injured hearts 10 days following MI. At least 5 separate isolations were done from 4-5 mouse hearts.

### Supplementary Figure 7.

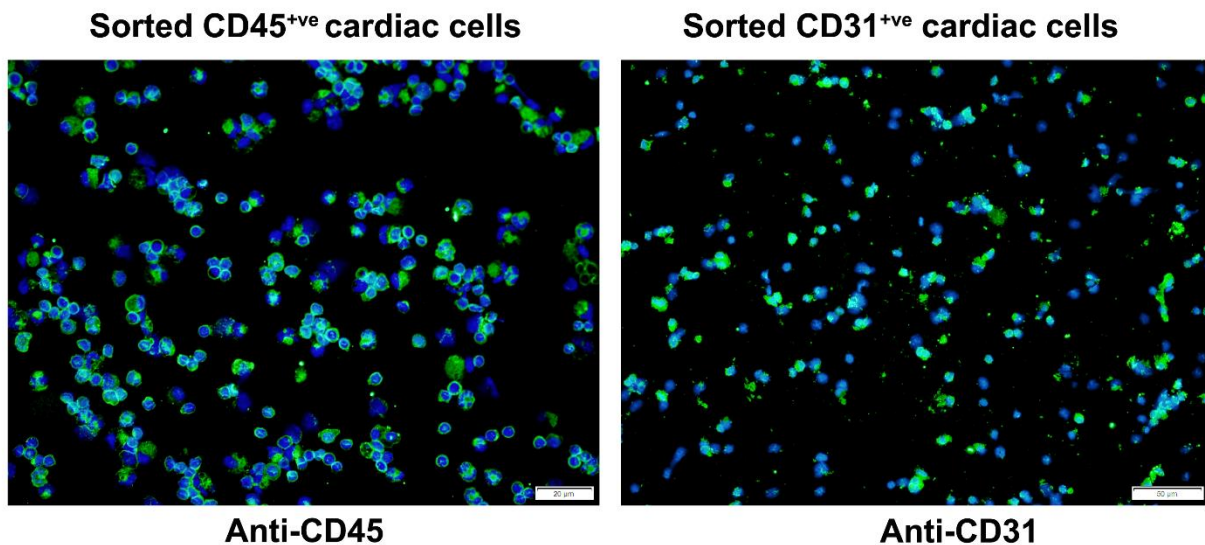

**Supplementary Figure 7. Positive control for CD45 and CD31 immunostaining.** Representative micrograph of immunostained cells detecting CD45 and CD31 by 488 (green) and DAPI (blue) for nuclear staining. Endothelial and hematopoietic cells (P0) were isolated from FSP1-GFP mice hearts 10 days after MI and cytopspun on slides for immunostaining. (n=3).



## Supplementary Figure 8.

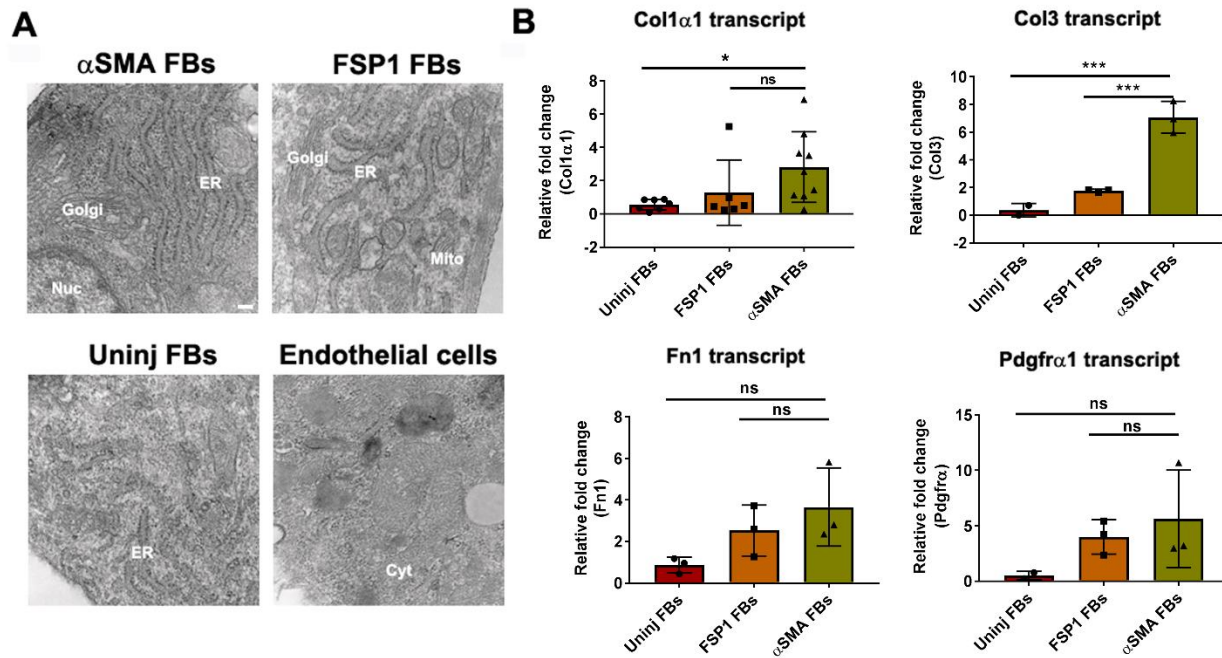

**Supplementary Figure 8. Uninjured, FSP1, and αSMA FBs are ultrastructurally similar.** **A.** FSP1 and αSMA expressing fibroblasts were isolated from mice 10 days following MI. Uninjured fibroblasts and endothelial cells were isolated from C57Bl/6 mice. Electron microscopy of αSMA, FSP1, and uninjured cardiac fibroblasts (FB), and endothelial cells (P0-P1) from mice. Scale bar=100 nM; 67000X magnification. Organelles including golgi apparatus (Golgi), mitochondria (Mito), rough endoplasmic reticulum (ER), cytoplasm (Cyt) and nucleus (Nuc) can be identified. **B.** Relative fold change of *Col1α1* (n=7 for uninjured, n=6 for FSP1<sup>+</sup>, and n=9 for αSMA<sup>+</sup> fibroblasts), *Col3* (n=2 for uninjured, n=2 for FSP1<sup>+</sup>, and n=3 for αSMA<sup>+</sup> fibroblasts),, fibronectin (*Fn1*) (n=3 for uninjured, n=3 for FSP1<sup>+</sup>, and n=3 for αSMA<sup>+</sup> fibroblasts), and *Pdgfra1*, (n=2 for uninjured, n=3 for FSP1<sup>+</sup>, and n=3 for αSMA<sup>+</sup> fibroblasts) transcripts measured by real

time RT-PCR in cultured uninjured, FSP1, and  $\alpha$ SMA fibroblasts (P3-P5); <sup>ns</sup>p>0.05, \*p <0.05, and \*\*\*p <0.0001 was calculated by one way ANOVA, n=3 experiments were performed; bar represent mean  $\pm$ SD.

### Supplementary Figure 9.

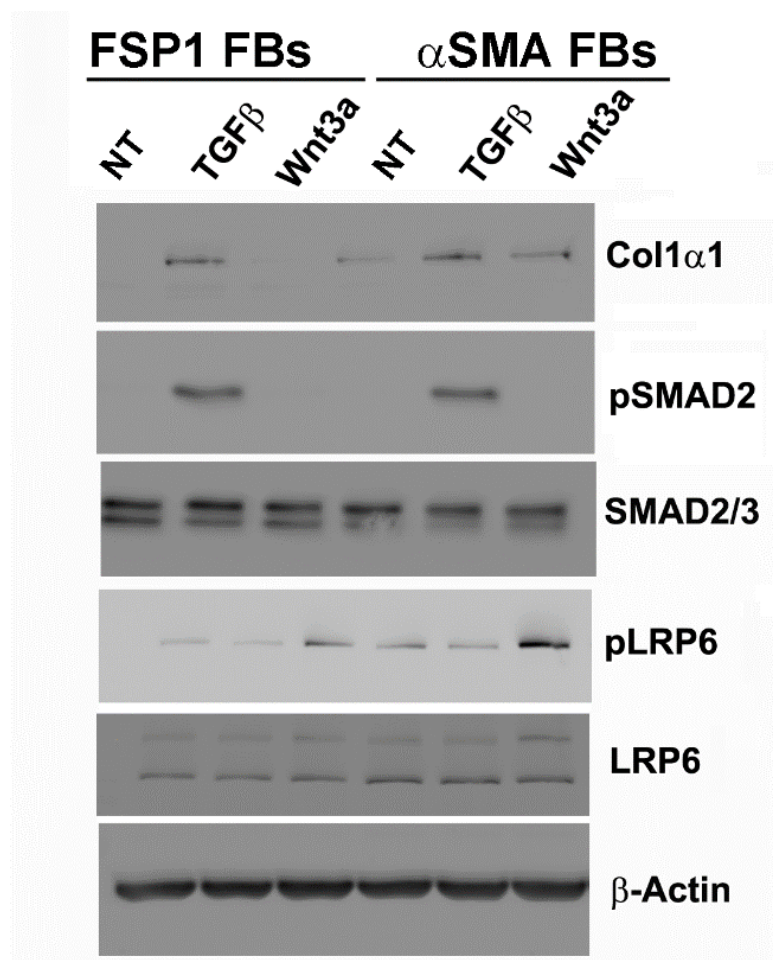

**Supplementary Figure 9. FSP1<sup>+</sup> and  $\alpha$ SMA<sup>+</sup> fibroblasts are responsive to pro-fibrotic cytokines.** FSP1 and  $\alpha$ SMA expressing fibroblasts were isolated from mice 10

days following MI. Cells were cultured and treated with treated with TGF $\beta$  or WNT3A proteins for 24 hours in 2% serum (P3-P5). Immunoblot analysis of COL1 $\alpha$ 1, pSMAD2, SMAD2, pLRP6, and LRP6 in FSP1 and  $\alpha$ SMA fibroblast cell lysates.  $\beta$ -actin was used as loading control (n=3).

### Supplementary Figure 10.

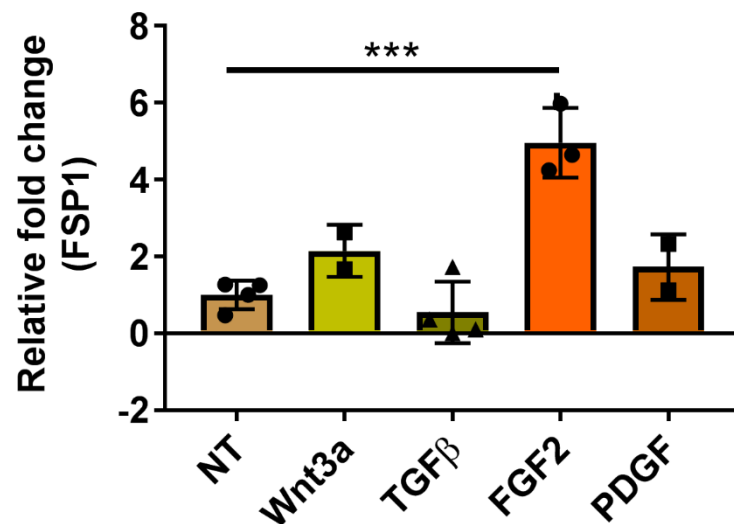

**Supplementary Figure 10.** Uninjured fibroblasts express FSP1 after treatment with different growth factors. Relative expression of *Fsp1* in uninjured fibroblasts (P3) untreated (n=4) and treated with WNT3A (50 ng/ml; n=2), TGF $\beta$  (10ng/ml; n=4), or FGF-2 (25 ng/ml; n=3), PDGFBB (1:1000; n=2) for 24 hours measured by semi-quantitative RT-PCR. \*\*\*p <0.0001 was calculated by one way ANOVA; bar represent mean  $\pm$ SD.

Supplementary Figure 11.

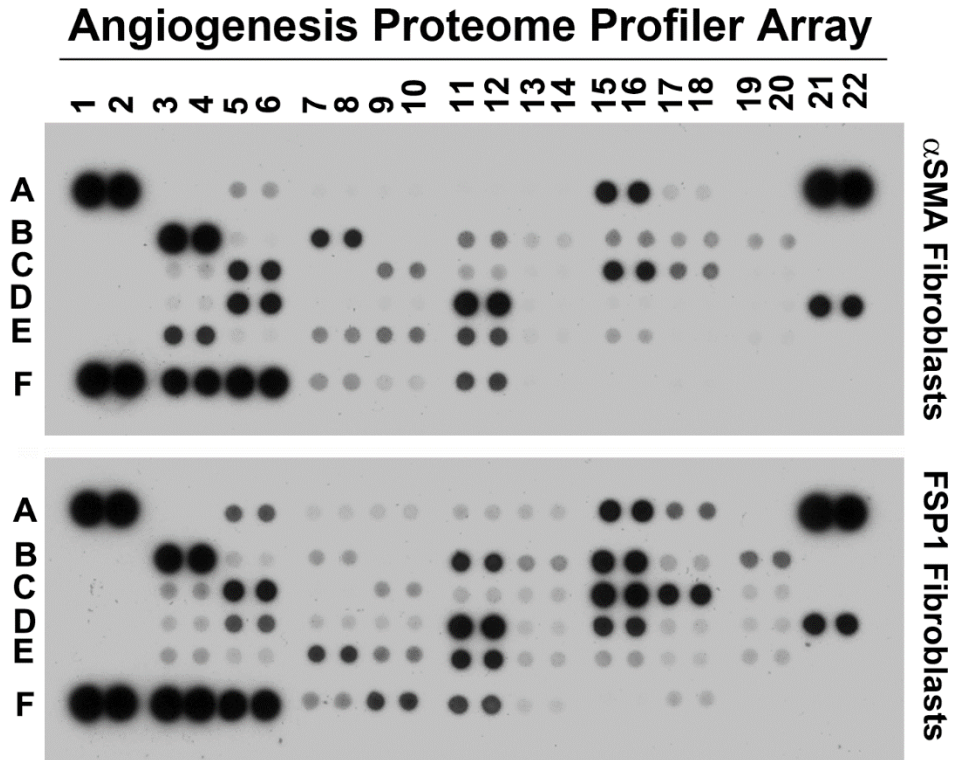

**Supplementary Figure 11. Expression profile of angiogenesis-related proteins in FSP1 and  $\alpha$ SMA fibroblasts.** Immunoblot for angiogenesis-related proteins present in 300  $\mu$ g of FSP1 and  $\alpha$ SMA fibroblast cell lysates cultured for 72 hours (P3-P5) in 0.5% serum. Mouse angiogenesis proteome profiler array was used to perform the assay (n=2 technical replicates). Corresponding pixel density of each spot is provided in Supplementary Table 1.

Supplementary Table 1.

| <b>Coordinate</b> | <b>Analyte/Control</b> | <b>FSP1 Lysate</b> | <b><math>\alpha</math>SMA Lysate</b> |
|-------------------|------------------------|--------------------|--------------------------------------|
| A1                | Reference Spot         | 145869.5           | 147160                               |
| A2                | Reference Spot         | 147185             | 144083                               |
| A3                |                        | 16                 | 14                                   |
| A4                |                        | 0                  | 4                                    |
| A5                | ADAMTS1                | 16363              | 4705                                 |
| A6                | ADAMTS1                | 16726              | 2764                                 |
| A7                | Amphiregulin           | 3                  | 15                                   |
| A8                | Amphiregulin           | 6                  | 2                                    |
| A9                | Angiogenin             | 10                 | 11                                   |
| A10               | Angiogenin             | 40                 | 6                                    |
| A11               | Angiopoietin-1         | 560                | 3                                    |
| A12               | Angiopoietin-1         | 292                | 2                                    |
| A13               | Angiopoietin-3         | 181                | 2                                    |
| A14               | Angiopoietin-3         | 47                 | 0                                    |
| A15               | Coagulation Factor III | 46945              | 47004                                |
| A16               | Coagulation Factor III | 47437              | 46869                                |
| A17               | CXCL16                 | 13635              | 93                                   |
| A18               | CXCL16                 | 14118              | 15                                   |
| A19               |                        | 66                 | 4                                    |
| A20               |                        | 3                  | 0                                    |
| A21               | Reference Spot         | 140365             | 148495                               |
| A22               | Reference Spot         | 139409             | 149055                               |
| B1                |                        | 44                 | 0                                    |
| B2                |                        | 17                 | 155                                  |
| B3                | Cyr61                  | 99674              | 104713                               |
| B4                | Cyr61                  | 99376              | 98541                                |
| B5                | DLL4                   | 921                | 53                                   |
| B6                | DLL4                   | 3                  | 4                                    |
| B7                | DPPIV                  | 2456               | 29696                                |
| B8                | DPPIV                  | 2452               | 29338                                |
| B9                | EGF                    | 2                  | 0                                    |
| B10               | EGF                    | 8                  | 0                                    |
| B11               | Endoglin               | 33618              | 9835                                 |
| B12               | Endoglin               | 30026              | 9260                                 |
| B13               | Endostatin/Col XVIII   | 5970               | 104                                  |
| B14               | Endostatin/Col XVIII   | 5108               | 25                                   |
| B15               | Endothelin-1           | 57748              | 6261                                 |
| B16               | Endothelin-1           | 60339              | 6793                                 |
| B17               | FGF acidic             | 1956               | 2411                                 |

|            |                    |       |       |
|------------|--------------------|-------|-------|
| <b>B18</b> | <b>FGF acidic</b>  | 1438  | 3467  |
| <b>B19</b> | <b>FGF basic</b>   | 13618 | 2037  |
| <b>B20</b> | <b>FGF basic</b>   | 15808 | 2309  |
| <b>B21</b> |                    | 35    | 0     |
| <b>B22</b> |                    | 1     | 0     |
| <b>C1</b>  |                    | 355   | 0     |
| <b>C2</b>  |                    | 76    | 39    |
| <b>C3</b>  | <b>KGF</b>         | 6082  | 585   |
| <b>C4</b>  | <b>KGF</b>         | 7208  | 1297  |
| <b>C5</b>  | <b>Fractalkine</b> | 48287 | 37949 |
| <b>C6</b>  | <b>Fractakine</b>  | 46467 | 36728 |
| <b>C7</b>  | <b>GM-CSF</b>      | 35    | 2     |
| <b>C8</b>  | <b>GM-CSF</b>      | 0     | 0     |
| <b>C9</b>  | <b>HB-EGF</b>      | 3901  | 9864  |
| <b>C10</b> | <b>HB-EGF</b>      | 3482  | 9245  |
| <b>C11</b> | <b>HGF</b>         | 545   | 1374  |
| <b>C12</b> | <b>HGF</b>         | 393   | 986   |
| <b>C13</b> | <b>IGFBP-1</b>     | 46    | 0     |
| <b>C14</b> | <b>IGFBP-1</b>     | 208   | 1     |
| <b>C15</b> | <b>IGFBP-2</b>     | 70810 | 37264 |
| <b>C16</b> | <b>IGFBP-2</b>     | 66097 | 35377 |
| <b>C17</b> | <b>IGFBP-3</b>     | 47282 | 12669 |
| <b>C18</b> | <b>IGFBP-3</b>     | 44843 | 10439 |
| <b>C19</b> | <b>IL-1a</b>       | 42    | 7     |
| <b>C20</b> | <b>IL-1a</b>       | 77    | 5     |
| <b>C21</b> | <b>IL-1b</b>       | 3     | 11    |
| <b>C22</b> | <b>IL-1b</b>       | 0     | 0     |
| <b>D1</b>  |                    | 52    | 1     |
| <b>D2</b>  |                    | 0     | 0     |
| <b>D3</b>  | <b>IL-10</b>       | 511   | 40    |
| <b>D4</b>  | <b>IL-10</b>       | 807   | 55    |
| <b>D5</b>  | <b>IP-10</b>       | 19444 | 46360 |
| <b>D6</b>  | <b>IP-10</b>       | 19376 | 44902 |
| <b>D7</b>  | <b>KC</b>          | 180   | 14    |
| <b>D8</b>  | <b>KC</b>          | 112   | 98    |
| <b>D9</b>  | <b>Leptin</b>      | 36    | 1     |
| <b>D10</b> | <b>Leptin</b>      | 109   | 4     |
| <b>D11</b> | <b>MCP-1</b>       | 67828 | 62634 |
| <b>D12</b> | <b>MCP-1</b>       | 66127 | 61391 |
| <b>D13</b> | <b>MIP-1a</b>      | 33    | 3     |
| <b>D14</b> | <b>MIP-1a</b>      | 27    | 5     |
| <b>D15</b> | <b>MMP-3</b>       | 37937 | 13    |

|     |                   |          |        |
|-----|-------------------|----------|--------|
| D16 | MMP-3             | 37605    | 15     |
| D17 | MMP-8             | 149      | 4      |
| D18 | MMP-8             | 54       | 2      |
| D19 | MMP-9             | 24       | 5      |
| D20 | MMP-9             | 90       | 138    |
| D21 | NOV               | 48329    | 49160  |
| D22 | NOV               | 48824    | 48128  |
| E1  |                   | 39       | 0      |
| E2  |                   | 0        | 28     |
| E3  | Osteopontin       | 3256     | 29137  |
| E4  | Osteopontin       | 2899     | 29398  |
| E5  | PD-ECGF           | 115      | 3      |
| E6  | PD-ECGF           | 76       | 4      |
| E7  | PDGF-AA           | 22759    | 6240   |
| E8  | PDGF-AA           | 23113    | 6338   |
| E9  | PDGF-AB/PDGF-BB   | 8401     | 10118  |
| E10 | PDGF-AB/PDGF-BB   | 8623     | 9960   |
| E11 | Pentraxin-3       | 37687    | 22722  |
| E12 | Pentraxin-3       | 37000    | 21366  |
| E13 | Platelet Factor 4 | 513      | 19     |
| E14 | Platelet factor 4 | 293      | 2      |
| E15 | pIGF-2            | 2561     | 1605   |
| E16 | PIGF-2            | 3098     | 1140   |
| E17 | Prolactin         | 18       | 3      |
| E18 | Prolactin         | 29       | 7      |
| E19 | Proliferin        | 421      | 4      |
| E20 | Proliferin        | 516      | 24     |
| E21 |                   | 1        | 0      |
| E22 |                   | 0        | 0      |
| F1  | Reference Spots   | 122164   | 132011 |
| F2  | Reference Spots   | 110704   | 121897 |
| F3  | SDF-1             | 113140   | 85949  |
| F4  | SDF-1             | 112142.5 | 94331  |
| F5  | Serpin E1         | 85047    | 104152 |
| F6  | Serpin E1         | 95081    | 100574 |
| F7  | Serpin F1         | 5866     | 4868   |
| F8  | Serpin F1         | 6062     | 4478   |
| F9  | Thrombospondin-2  | 24931    | 63     |
| F10 | Thrombospondin-2  | 25168    | 6      |
| F11 | TIMP-1            | 24918    | 22589  |
| F12 | TIMP-1            | 24753    | 23302  |
| F13 | TIMP-4            | 8        | 4      |

|            |                         |     |    |
|------------|-------------------------|-----|----|
| <b>F14</b> | <b>TIMP-4</b>           | -1  | 14 |
| <b>F15</b> | <b>VEGF</b>             | 0   | 15 |
| <b>F16</b> | <b>VEGF</b>             | 0   | 14 |
| <b>F17</b> | <b>VEGF-B</b>           | 432 | 7  |
| <b>F18</b> | <b>VEGF-B</b>           | 321 | 0  |
| <b>F19</b> | <b>Negative Control</b> | 0   | 0  |
| <b>F20</b> | <b>Negative Control</b> | 5   | 0  |

**Supplementary Table 1.** Pixel density of the immunoblot of angiogenesis-related proteins present in FSP1+ and  $\alpha$ SMA+ fibroblast cell lysates identified by mouse angiogenesis proteome profiler array (n=2).



**Supplementary Table 2.**

| <b>Oligo Name</b> | <b>Forward (5'-3')</b>    | <b>Reverse (5'-3')</b>    |
|-------------------|---------------------------|---------------------------|
| Alpha SMA         | CAGGCATGGATGGCATCAATCAC   | ACTCTAGCTGTGAAGTCAGTGTCG  |
| Angpt1-1          | CACGTGGAGCCGGATTTCT       | ATCTGGGCCATCTCCGACTT      |
| Col1 $\alpha$ 1   | GCCAGATGGGTCCCCGAGGT      | GGGGGTCCAGCAGCACCAAC      |
| Collagen 3        | GAAAAAACCTGCTCGGAATT      | GGATCAACCCAGTATTCTCCACTCT |
| Fgf1-1            | AGGAAACGTCCACAGTCAGG      | CTCCTACGCCACTCTTCAG       |
| Fn-1              | CGAGGTGACAGAGACCACAA      | CTGGAGTCAAGCCAGACACA      |
| Fsp1              | CGGTTACCATGGCAAGACCC      | TGTGCGAAGAAGCCAGAGTAAG    |
| Gremlin           | AGCAAAAGGGTTTTCTGAT       | AATGGTCAGCATTTCACCCT      |
| AN2/NG2-1         | CCTCAGAGCCCTATCTCCACGTAGC | CATCACCAAGTAGCCAGCGTTCG   |
| PDGFR $\alpha$    | CAAACCCTGAGACCACAATG      | TCCCCAACAGTAACCCAAG       |
| VEGF-A-2          | AAAGGCTTCAGTGTGGTCTGAGAG  | GGTTGGAACCGGCATCTTTATC    |
| VEGF-B-2          | TTAGAGCTCAACCCAGACACCTGTA | CCTGTGAAGCAGGGCCATAA      |
| 18S               | CGCCGCTAGAGGTGAAATTCT     | CGAACCTCCGACTTTCGTTCT     |

**Supplementary Table 2.** Primers used to analyze the gene expression changes by quantitative real time RTPCR analysis.

**Supplementary Table 3.** Tabular presentation of flow cytometry data at baseline and 10 days following myocardial injury in  $\alpha$ SMA-GFP mice hearts.

| Freshly isolated cardiac cells         | GFP+ from live cells | GFP+/AN2+ | GFP+/AN2- | GFP+/CD31+ | GFP+/CD45+ | GFP+/CD31-/CD45- |
|----------------------------------------|----------------------|-----------|-----------|------------|------------|------------------|
| $\alpha$ SMA-GFP MI (n=5)              | 15.20%               | 0.24%     | 99.40%    | 2.98%      | 3.78%      | 91.60%           |
|                                        | 8.79%                | 0.03%     | 99.40%    | 5.05%      | 4.35%      | 89.10%           |
|                                        | 21.10%               | 0.09%     | 99.60%    | 2.87%      | 4.76%      | 91.20%           |
|                                        | 15.30%               | 0.30%     | 99.10%    | 3.10%      | 2.18%      | 92.80%           |
|                                        | 10.50%               | 0.11%     | 99.60%    | 4.98%      | 0.84%      | 92.00%           |
| <b>Average</b>                         | 14.18%               | 0.15%     | 99.42%    | 3.80%      | 3.18%      | 91.34%           |
| <b>Std Dev</b>                         | 0.0482               | 0.0011    | 0.0020    | 0.0112     | 0.0164     | 0.0138           |
| $\alpha$ SMA-GFP Uninjured heart (n=6) | 0.02%                | 0%        | 100%      | 11.10%     | 0%         | 88.90%           |
|                                        | 0%                   | 0%        | 0%        | 0%         | 0%         | 0%               |
|                                        | 0%                   | 0%        | 0%        | 0%         | 0%         | 0%               |
|                                        | 0%                   | 0%        | 0%        | 0%         | 0%         | 0%               |
|                                        | 9.21E-05             | 0%        | 100%      | 25.00%     | 0%         | 75.00%           |
|                                        | 0.03%                | 0%        | 100%      | 0%         | 30.00%     | 70.00%           |
| <b>Average</b>                         | 0.01%                | 0.00%     | 50.00%    | 6.02%      | 5.00%      | 38.98%           |
| <b>Std Dev</b>                         | 0.0001               | 0.0000    | 0.5477    | 0.1031     | 0.1225     | 0.4315           |

**Supplementary Table 3.** Flow cytometric evaluation of %GFP+ live cells present in the  $\alpha$ SMA-GFP mice hearts at baseline (uninjured; n=6; bottom) or 10 days following myocardial infarction (MI; n=5; top). Percentage of GFP+ cells expressing markers of hematopoietic cells (CD45), endothelial cells (CD31) and pericytes/vascular smooth muscle cell marker (AN2) were also evaluated in both uninjured and injured hearts.

**Supplementary Table 4.** Tabular presentation of flow cytometry data at baseline and 10 days following myocardial injury in FSP1-GFP mice hearts.

| Freshly isolated cardiac cells        | GFP+ from live cells | GFP+/CD31+ | GFP+/CD45+ | GFP+/CD45- /CD31- | GFP+/CD31-/CD45- /AN2+ |
|---------------------------------------|----------------------|------------|------------|-------------------|------------------------|
| <b>FSP1-GFP MI (n=5)</b>              | 17.00%               | 5.04%      | 8.99%      | 12.20%            | 0.82%                  |
|                                       | 12.60%               | 8.29%      | 12.00%     | 12.40%            | 0.29%                  |
|                                       | 10.60%               | 11.10%     | 12.80%     | 19.00%            | 1.32%                  |
|                                       | 5.31%                | 7.72%      | 18.40%     | 11.40%            | 0.15%                  |
|                                       | 14.80%               | 8.75%      | 11.30%     | 17.50%            | 0.10%                  |
| <b>Average</b>                        | 12.06%               | 8.18%      | 12.70%     | 14.50%            | 0.54%                  |
| <b>Std Dev</b>                        | 0.0447               | 0.0218     | 0.0349     | 0.0348            | 0.0052                 |
| <b>FSP1-GFP Uninjured heart (n=5)</b> | 0%                   | 0%         | 0%         | 0%                | 0%                     |
|                                       | 0.02%                | 0%         | 0%         | 0%                | 0%                     |
|                                       | 0%                   | 0%         | 0%         | 0%                | 0%                     |
|                                       | 0.33%                | 19.70%     | 18.00%     | 14.00%            | 0%                     |
|                                       | 0.04%                | 28.00%     | 32.00%     | 0%                | 0%                     |
| <b>Average</b>                        | 0.08%                | 9.54%      | 10.00%     | 2.80%             | 0.00%                  |
| <b>Std Dev</b>                        | 0.0014               | 0.1339     | 0.1456     | 0.0626            | 0.0000                 |

**Supplementary Table 4.** Flow cytometric evaluation of %GFP+ live cells present in the FSP1-GFP mice hearts at baseline (uninjured; n=5; bottom) or 10 days following myocardial infarction (MI; n=5; top). Percentage of GFP+ cells expressing markers of hematopoietic cells (CD45) and endothelial cells (CD31) were also evaluated. Gated GFP+/CD45-/CD31- cells were analyzed for the presence of pericytes/vascular smooth muscle cell marker (AN2) in both uninjured and injured hearts.
